# Supplementary material
Source: Springer Nature journal article supplement (https://www.springermedizin.de/resource/supplementary/12913_2011_1697_MOESM3_ESM.pdf/9528756)

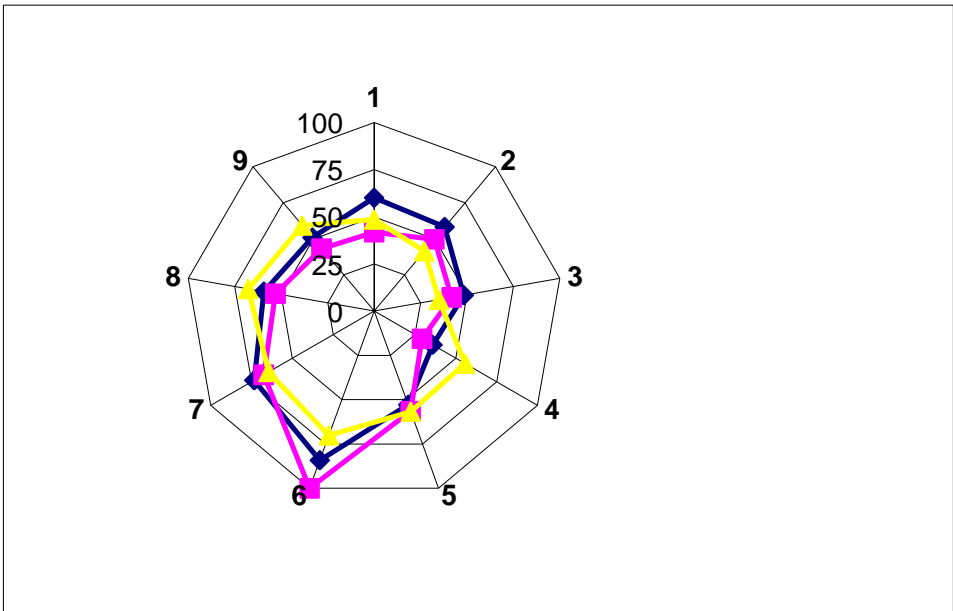

— Dementia

— AMI

— Stroke

Supplement: MOESM3 [file 9528756]
